# Supplementary material
Source: HighWire-hosted journal article supplement (https://www.annfammed.org/content/suppl/2024/09/19/22.5.457)
Supplement: Barbour_Supp.pdf [file Barbour_Supp.pdf]

## Supplemental materials for:

Using the Electronic Health Record to Facilitate Patient-Physician Relationship While Establishing Care.

*Ann Fam Med.* 2024;22(5):457.

Samantha Barbour

Elizabeth Fleming, MD

University of Wisconsin School of Medicine and Public Health, Madison, Wisconsin

---

## References

1. Rake D, Golant SK. *The Compassionate Connection: The Healing Power of Empathy and Mindful Listening*. 1st ed. W. W. Norton & Company; 2018.
2. Drossman DA, Palsson O, Stein E, Ruddy J, Lennon AMO. What elements in the physician-patient relationship (PPR) contribute to patient satisfaction: development of a short form PPRS-Patient Version (PPRS-Patient SF) questionnaire. *Neurogastroenterol Motil.* 2022;34(2):e14191. [10.1111/nmo.14191](#)
3. Orom H, Underwood W III, Cheng Z, Homish DL, Scott I. Relationships as medicine: quality of the physician-patient relationship determines physician influence on treatment recommendation adherence. *Health Serv Res.* 2018;53(1):580-596. [10.1111/1475-6773.12629](#)
4. Olaisen RH, Schluchter MD, Flocke SA, Smyth KA, Koroukian SM, Stange KC. Assessing the longitudinal impact of physician-patient relationship on functional health. *Ann Fam Med.* 2020;18(5):422-429. [10.1370/afm.2554](#)
5. Hieffner AR, Constable P, Ross K, Sepdham D, Ventimiglia JB. Protecting family physicians from burnout: meaningful patient-physician relationships are “more than just medicine”. *J Am Board Fam Med.* 2022;35(4):716-723. [10.3122/jabfm.2022.04.210441](#)
6. Abbo ED, Zhang Q, Zelder M, Huang ES. The increasing number of clinical items addressed during the time of adult primary care visits. *J Gen Intern Med.* 2008;23(12):2058-2065. [10.1007/s11606-008-0805-8](#)
7. Ahearn E, Ewald C, Nathan S, Ringler T. My life, my story: connecting patients, providers, and student learners with life stories (P12). *J Pain Symptom Manage.* 2019;57(2):358-359. [10.1016/j.jpainsymman.2018.12.020](#)

| <b>Supplemental Table. Theme and subtheme frequencies within MyChart responses</b> |                                 |                                                                                                                                              |
|------------------------------------------------------------------------------------|---------------------------------|----------------------------------------------------------------------------------------------------------------------------------------------|
| <b>Theme / Subtheme</b>                                                            | <b>Freq. (no. of responses)</b> | <b>Response Examples</b>                                                                                                                     |
| <b>Personal Information</b>                                                        | <b>73% (11)</b>                 |                                                                                                                                              |
| Relationships                                                                      | 47% (7)                         | I am getting married on [date] and my partner and I have started talking about having kids.                                                  |
| Occupation                                                                         | 40% (6)                         | I am currently serving in the Wisconsin National Guard                                                                                       |
| Identity                                                                           | 33% (5)                         | I'm passionate about helping others and if I can help, even if a little, I am more than happy to go the extra mile.                          |
| Hobbies                                                                            | 33% (5)                         | In my free time I play competitive volleyball year round and hang out with my dog!                                                           |
| Geographical                                                                       | 20% (3)                         | recently moved into an apartment in [location]                                                                                               |
| Defining Life Experiences                                                          | 7% (1)                          | I have been hiding who I was since the first time I came out at 13 and got badly beaten up.                                                  |
| Education                                                                          | 7% (1)                          | I am attending [school] fully online for their Psych program to someday open my own practice.                                                |
| <b>Health</b>                                                                      | <b>67% (10)</b>                 |                                                                                                                                              |
| Current Concerns                                                                   | 40% (6)                         | My main concern is prostate as I go to the bathroom 3-4 times each night.                                                                    |
| Health History                                                                     | 20% (3)                         | After 17 surgeries and a broken neck I'm very familiar with my body and its needs.                                                           |
| Health Goals                                                                       | 40% (6)                         | I seek to maintain my fitness, nutrition and overall well being to support good health and longevity.                                        |
| Previous Healthcare Experiences                                                    | 13% (2)                         | I have had difficulty finding a medical clinic that I feel comfortable at. I have also had a hard time finding a provider who is a good fit. |
| <b>Reaction to message</b>                                                         | <b>40% (6)</b>                  |                                                                                                                                              |
| Expectations of provider / visit                                                   | 20% (3)                         | A relationship is built on good communication and mutual respect.                                                                            |
| Unsure what to say                                                                 | 13% (2)                         | Not sure what else to share.                                                                                                                 |
| Positive Feedback                                                                  | 13% (2)                         | I appreciate you reaching out and focusing on the person and not just the diagnoses!                                                         |
| Negative Feedback                                                                  | 7% (1)                          | I expect my physicians to know the pertinent details of my physical/mental health, not so much my personal life.                             |
